# Supplementary material
Source: PubMed Central journal article supplement (PMC3023262)

1 **SUPPLEMENTAL FIGURE LEGEND**

2 Supplemental Fig. S1. hERG minigene splicing analysis. (A) Schematic of normal and cryptic  
3 splicing in WT hERG and hERG 2592+1G>A minigenes transfected into HEK293 cells. (B)  
4 Sequence analysis of the WT and mutant products from RT-PCR. The 432 bp, 569 bp and 622  
5 bp products were generated by the activation of cryptic splice sites in exon 10 (GAG/gtgctg), and  
6 intron 10 (GCT/gtgtga and ATG/gtatca). The 816 bp product is generated by the retention of  
7 intron 10. The 2592+1G>A mutation (inverted, black triangle) and the premature termination  
8 codon within intron 10 (inverted, red triangle) are shown.

9

10

11 SUPPLEMENTAL FIGURE

12 Fig. S1

A.

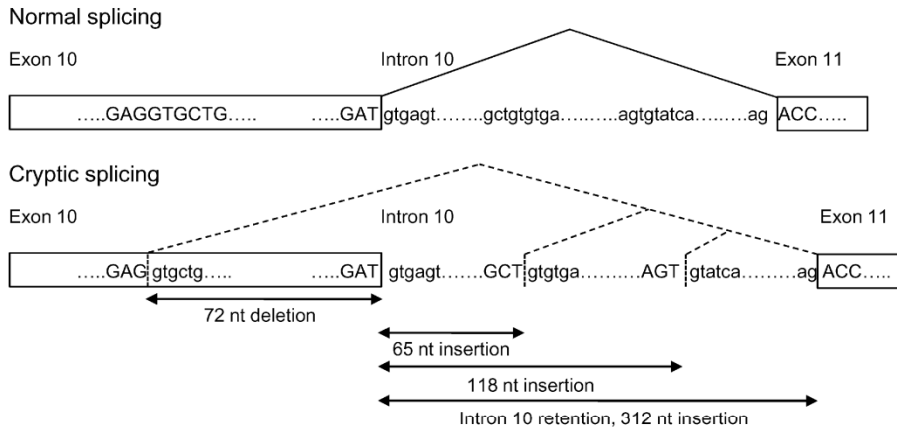

B.

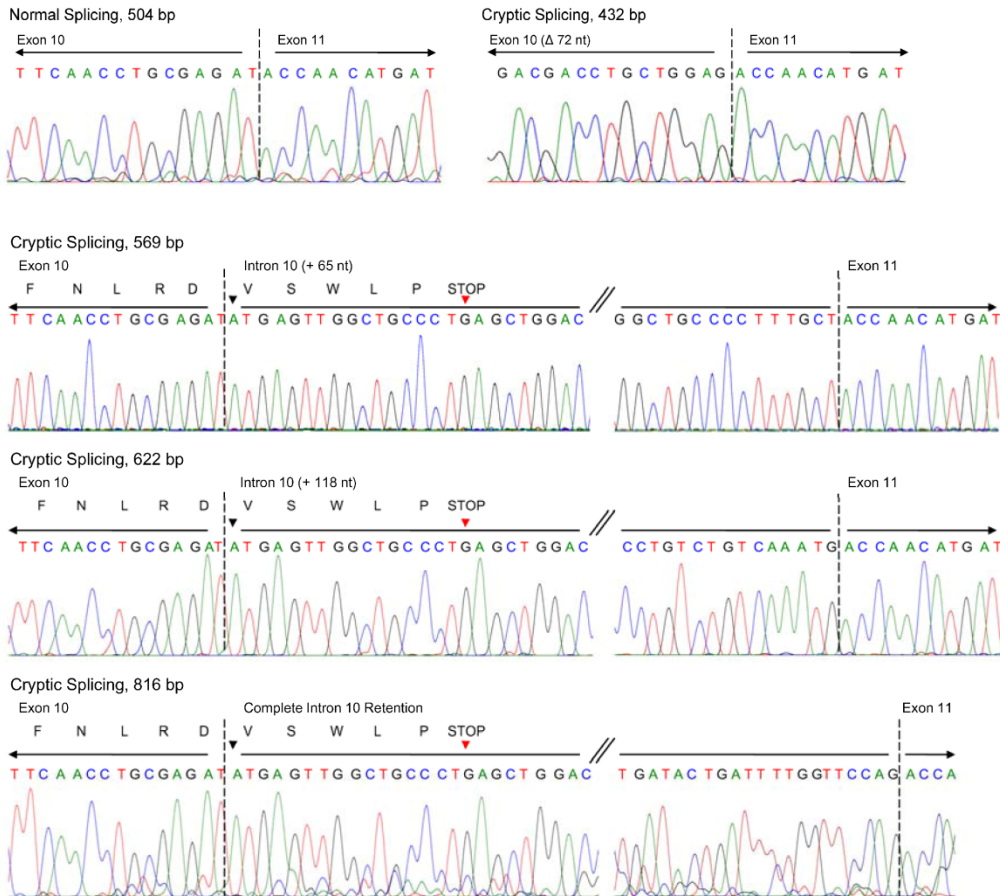

Supplement: supp_00818.2010_figS1.pdf [file supp_00818.2010_figS1.pdf]
